# Supplementary material for: Bioinspired aligned wrinkling dressings for monitoring joint motion and promoting joint wound healing
Source: Royal Society of Chemistry journal article supplement (doi:10.1039/d2bm00602b), 2022-01-01
Supplement: d2bm00602b1.pdf [file d2bm00602b1.pdf]

### Supporting information

#### Bioinspired aligned wrinkling dressings for monitoring joint motion and promoting joint wound healing

Xiaohui Zhou<sup>a</sup>, Pingping Feng<sup>a</sup>, Huanliang Liu<sup>\*,b</sup>, Botao Song<sup>\*,a</sup>

<sup>a</sup>Key Laboratory of Synthetic and Natural Functional Molecule of the Ministry of Education, College of Chemistry and Materials Science, Northwest University, Xi'an 710069, Shaanxi, People's Republic of China.

<sup>b</sup>Tianjin Institute of Environmental and Operational Medicine, Tianjin 300050, People's Republic of China.

Corresponding author: Botao Song (E-mail: [botaosong@nwu.edu.cn](mailto:botaosong@nwu.edu.cn)); Huanliang Liu (E-mail:

[tliuhuanliang@126.com](mailto:tliuhuanliang@126.com))

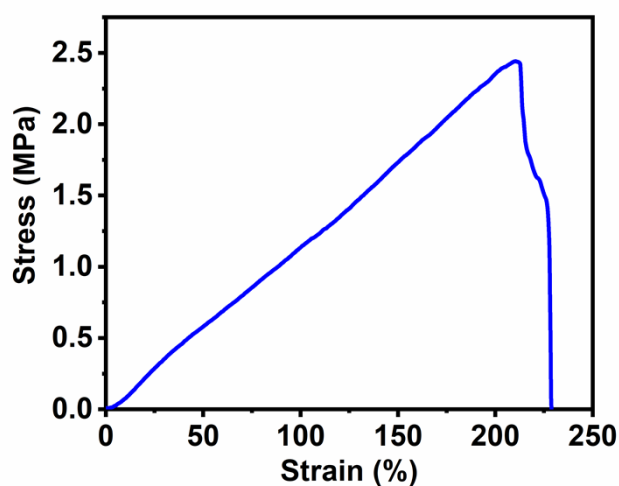

Figure S1. Tensile stress-strain curve of the bioinspired dressing.

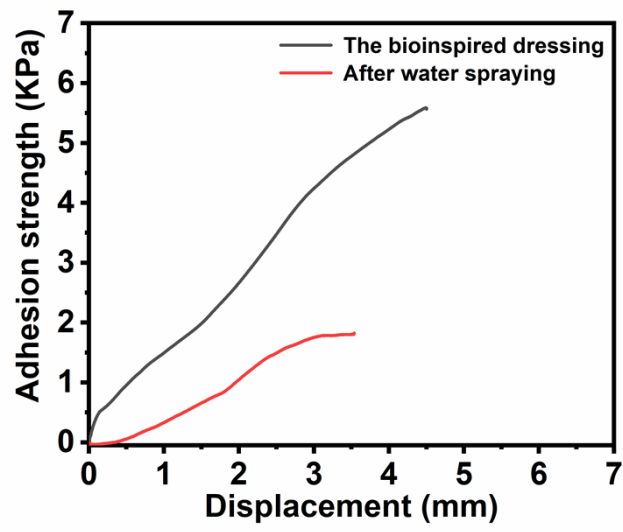

Figure S2. The adhesion strength of the bioinspired dressing before and after spraying with water.

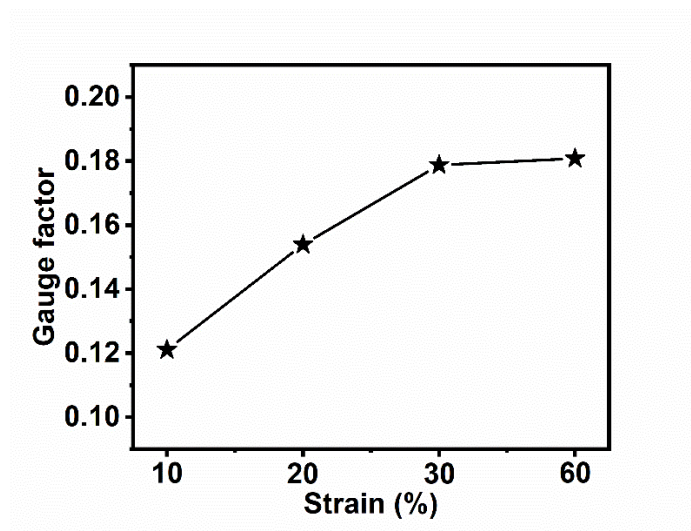

Figure S3. The gauge factors of dressing in different tensile strains.

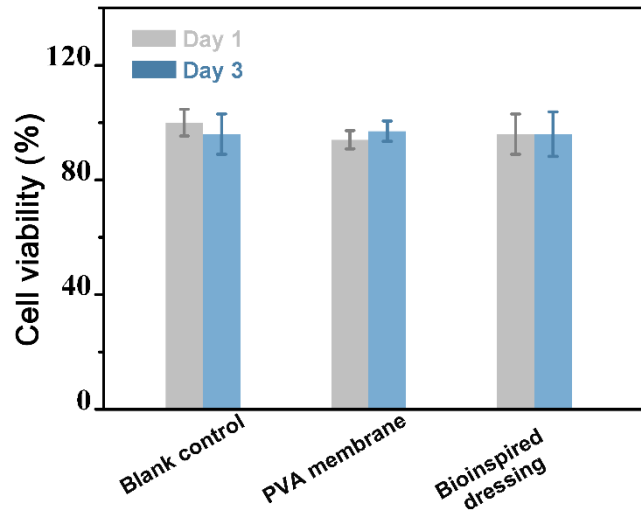

Figure S4. *In vitro* cytotoxicity of the bioinspired dressing, the single-layered PVA membrane, and the blank group.

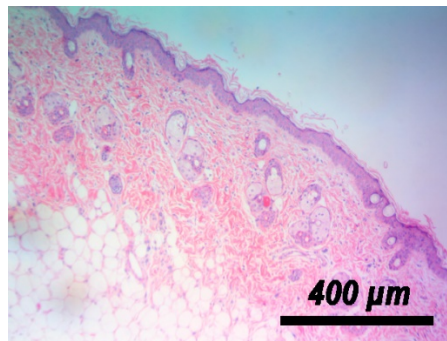

Figure S5. H&E staining result of the normal mouse skin.

Movie S1. Formation of bioinspired aligned wrinkles on wet pork skin.
